# Supplementary material for: Efficient backbone cyclization of linear peptides by a recombinant asparaginyl endopeptidase
Source: PubMed Central journal article supplement (PMC4703859; doi:10.1038/ncomms10199), 2015-12-18
Supplement: ncomms10199-s1.pdf [file ncomms10199-s1.pdf]

1. *Oldendlandia affinis* AEP1 (c.5.2)
2. *Oldendlandia affinis* AEP2 (c.1.15)
3. *Oldendlandia affinis* AEP3 (c.3.6)
4. *Canavalia ensiformis* legumain (P49046)
5. *Phaseolus vulgaris* VPE1 (O24325)
6. *Glycine max* VPE1 (P49045)
7. *Citroia ternatea* Butelase 1
8. human Legumain (Q99538)

```

1      10      20      30      40      50      60      70      80
MVRRLAGA--VLLVLSVAAAASVSGARDQDYHHSVSRPERPQETNDHEDSIVLTKWAVLIGSGSGLANRYRH
MVRFPAGA--VLLVLSVAVDAGAR--DGYDRHSVSRPERPQETNDHEDSIVLTKWAVLIGSGSGLANRYRH
MVRMLAGAFQVVVLLVLSIAIASEERTDGYDRHSVSRPERPQETNDHEDSIVLTKWAVLIGSGSGLANRYRH
      MVMLVMVSLHGTAAARLNRRWDSVIGDITLTPV-----DDEVLTWAVLIGSGSGLANRYRH
      MATTTATSSLALLLFLVALVSAGRDLVGDFRHSVSDSGN-----GDNVHTWAVLIGSGSGLANRYRH
MALDRSLTSMATWVSVLWMMVVVVRVHGAAARPKKRWDSVIRKDTLTPV-----DADSDEVTWAVLIGSGSGLANRYRH
      MKNP--LAIIFLITAVVAVVSGIRDVFRHSVQASKFFQAD-----DNLVLTWAVLIGSGSGLANRYRH
      MVWVAVFLSVALGIGAVPIIDPDGGRIMVITIGSGSGLANRYRH

```

1. *Oldendlandia affinis* AEP1 (c.5.2)
2. *Oldendlandia affinis* AEP2 (c.1.15)
3. *Oldendlandia affinis* AEP3 (c.3.6)
4. *Canavalia ensiformis* legumain (P49046)
5. *Phaseolus vulgaris* VPE1 (O24325)
6. *Glycine max* VPE1 (P49045)
7. *Citroia ternatea* Butelase 1
8. human Legumain (Q99538)

```

90      100     110     120     130     140     150     160     170
QADVCHAYQLRKRSGGLRNLIVFMVDDIAYNNEIERRPGLVINSRPGSDVMVAGVPRDYDGDVNAKNNLAALIGNKSNIITIGSGR
QADLCHAYQLRKRSGGLRNLIVFMVDDIAYNNEIERRPGLVINSRPGSDVMVAGVPRDYDGDVNAKNNLAALIGNKSNIITIGSGR
QADVCHAYQLRKRSGGLRNLIVFMVDDIAYNNEIERRPGLVINSRPGSDVMVAGVPRDYDGDVNAKNNLAALIGNKSNIITIGSGR
QADVCHAYQLRKRSGGLRNLIVFMVDDIAYNNEIERRPGLVINSRPGSDVMVAGVPRDYDGDVNAKNNLAALIGNKSNIITIGSGR
QADVCHAYQLRKRSGGLRNLIVFMVDDIAYNNEIERRPGLVINSRPGSDVMVAGVPRDYDGDVNAKNNLAALIGNKSNIITIGSGR
QADVCHAYQLRKRSGGLRNLIVFMVDDIAYNNEIERRPGLVINSRPGSDVMVAGVPRDYDGDVNAKNNLAALIGNKSNIITIGSGR
QADVCHAYQLRKRSGGLRNLIVFMVDDIAYNNEIERRPGLVINSRPGSDVMVAGVPRDYDGDVNAKNNLAALIGNKSNIITIGSGR
QADVCHAYQLRKRSGGLRNLIVFMVDDIAYNNEIERRPGLVINSRPGSDVMVAGVPRDYDGDVNAKNNLAALIGNKSNIITIGSGR

```

1. *Oldendlandia affinis* AEP1 (c.5.2)
2. *Oldendlandia affinis* AEP2 (c.1.15)
3. *Oldendlandia affinis* AEP3 (c.3.6)
4. *Canavalia ensiformis* legumain (P49046)
5. *Phaseolus vulgaris* VPE1 (O24325)
6. *Glycine max* VPE1 (P49045)
7. *Citroia ternatea* Butelase 1
8. human Legumain (Q99538)

```

180     190     200     210     220     230     240     250
VVDSCGNDFHIFVYDHDGAGSVLGMSEKRLVLADELDNDAKRKHSAGTYSLSVFLVLAEGSSMDEGLLEPDLNIVATLSTNITIGS
VVDSCGNDFHIFVYDHDGAGSVLGMSEKRLVLADELDNDAKRKHSAGTYSLSVFLVLAEGSSMDEGLLEPDLNIVATLSTNITIGS
VVDSCGNDFHIFVYDHDGAGSVLGMSEKRLVLADELDNDAKRKHSAGTYSLSVFLVLAEGSSMDEGLLEPDLNIVATLSTNITIGS
VVDSCGNDFHIFVYDHDGAGSVLGMSEKRLVLADELDNDAKRKHSAGTYSLSVFLVLAEGSSMDEGLLEPDLNIVATLSTNITIGS
VVDSCGNDFHIFVYDHDGAGSVLGMSEKRLVLADELDNDAKRKHSAGTYSLSVFLVLAEGSSMDEGLLEPDLNIVATLSTNITIGS
VVDSCGNDFHIFVYDHDGAGSVLGMSEKRLVLADELDNDAKRKHSAGTYSLSVFLVLAEGSSMDEGLLEPDLNIVATLSTNITIGS
VVDSCGNDFHIFVYDHDGAGSVLGMSEKRLVLADELDNDAKRKHSAGTYSLSVFLVLAEGSSMDEGLLEPDLNIVATLSTNITIGS
VVDSCGNDFHIFVYDHDGAGSVLGMSEKRLVLADELDNDAKRKHSAGTYSLSVFLVLAEGSSMDEGLLEPDLNIVATLSTNITIGS

```

1. *Oldendlandia affinis* AEP1 (c.5.2)
2. *Oldendlandia affinis* AEP2 (c.1.15)
3. *Oldendlandia affinis* AEP3 (c.3.6)
4. *Canavalia ensiformis* legumain (P49046)
5. *Phaseolus vulgaris* VPE1 (O24325)
6. *Glycine max* VPE1 (P49045)
7. *Citroia ternatea* Butelase 1
8. human Legumain (Q99538)

```

260     270     280     290     300     310     320     330     340
SNVYVCGAQENRPEPEVYVGGDGFSAVAMEDSDVGNVSWYGNLNDVYHVDKRTS-----HASTATVGNLKLKLEEGDVMVYGSN
SNVYVCGQGEVPSPEPEVYVGGDGFSAVAMEDSDVGNVSWYGNLNDVYHVDKRTS-----HASTATVGNLKLKLEEGDVMVYGSN
SNVYVCGQDAGPEPEVYVGGDGFSAVAMEDSDVGNVSWYGNLNDVYHVDKRTS-----YASTATVGNLKLKLEEGDVMVYGSN
SFGVYCGMNPPEPEVYVGGDGFSAVAMEDSDVGNVSWYGNLNDVYHVDKRTS-----YASTATVGNLKLKLEEGDVMVYGSN
SFGVYCGEDPEPEVYVGGDGFSAVAMEDSDVGNVSWYGNLNDVYHVDKRTS-----YASTATVGNLKLKLEEGDVMVYGSN
SFGVYCGMDPEPEVYVGGDGFSAVAMEDSDVGNVSWYGNLNDVYHVDKRTS-----YASTATVGNLKLKLEEGDVMVYGSN
SFGVYCGQHPPEPEVYVGGDGFSAVAMEDSDVGNVSWYGNLNDVYHVDKRTS-----YASTATVGNLKLKLEEGDVMVYGSN
SFGVYCGVPEPEVYVGGDGFSAVAMEDSDVGNVSWYGNLNDVYHVDKRTS-----YASTATVGNLKLKLEEGDVMVYGSN

```

1. *Oldendlandia affinis* AEP1 (c.5.2)
2. *Oldendlandia affinis* AEP2 (c.1.15)
3. *Oldendlandia affinis* AEP3 (c.3.6)
4. *Canavalia ensiformis* legumain (P49046)
5. *Phaseolus vulgaris* VPE1 (O24325)
6. *Glycine max* VPE1 (P49045)
7. *Citroia ternatea* Butelase 1
8. human Legumain (Q99538)

```

350     360     370     380     390     400     410     420     430
DANDNTSLDGNATPSSIVNRRDADLHLWFKRKAPEGSARREFAQTDFRANSHRFDSDSLRLIGKLPDIEKCTEINAVY
DANDNTSLDGNATPSSIVNRRDADLHLWFKRKAPEGSARREFAQTDFRANSHRFDSDSLRLIGKLPDIEKCTEINAVY
DANDNTSLDGNATPSSIVNRRDADLHLWFKRKAPEGSARREFAQTDFRANSHRFDSDSLRLIGKLPDIEKCTEINAVY
DANDNTSLDGNATPSSIVNRRDADLHLWFKRKAPEGSARREFAQTDFRANSHRFDSDSLRLIGKLPDIEKCTEINAVY
DANDNTSLDGNATPSSIVNRRDADLHLWFKRKAPEGSARREFAQTDFRANSHRFDSDSLRLIGKLPDIEKCTEINAVY
DANDNTSLDGNATPSSIVNRRDADLHLWFKRKAPEGSARREFAQTDFRANSHRFDSDSLRLIGKLPDIEKCTEINAVY
DANDNTSLDGNATPSSIVNRRDADLHLWFKRKAPEGSARREFAQTDFRANSHRFDSDSLRLIGKLPDIEKCTEINAVY
DANDNTSLDGNATPSSIVNRRDADLHLWFKRKAPEGSARREFAQTDFRANSHRFDSDSLRLIGKLPDIEKCTEINAVY

```

1. *Oldendlandia affinis* AEP1 (c.5.2)
2. *Oldendlandia affinis* AEP2 (c.1.15)
3. *Oldendlandia affinis* AEP3 (c.3.6)
4. *Canavalia ensiformis* legumain (P49046)
5. *Phaseolus vulgaris* VPE1 (O24325)
6. *Glycine max* VPE1 (P49045)
7. *Citroia ternatea* Butelase 1
8. human Legumain (Q99538)

```

440     450     460     470     480     490     500     511
PAPSPVVDVVAQRSLVGTGPHH-----SSSFGDPRGRIIANIQAISEEQMAEASQDQASIFP
PAPSPVVDVVAQRSLVGTGPHH-----SSSFGDPRGRIIANIQAISEEQMAEASQDQASIFP
PAPSPVVDVVAQRSLVGTGPHH-----SSSFGDPRGRIIANIQAISEEQMAEASQDQASIFP
PAPSPVVDVVAQRSLVGTGPHH-----SSSFGDPRGRIIANIQAISEEQMAEASQDQASIFP
PAPSPVVDVVAQRSLVGTGPHH-----SSSFGDPRGRIIANIQAISEEQMAEASQDQASIFP
PAPSPVVDVVAQRSLVGTGPHH-----SSSFGDPRGRIIANIQAISEEQMAEASQDQASIFP
PAPSPVVDVVAQRSLVGTGPHH-----SSSFGDPRGRIIANIQAISEEQMAEASQDQASIFP
PAPSPVVDVVAQRSLVGTGPHH-----SSSFGDPRGRIIANIQAISEEQMAEASQDQASIFP

```

**Supplementary Figure 1: Sequence alignment of AEP homologues.** Experimentally validated auto-processing sites (N- and C-terminal) are highlighted in yellow. ▼ shows the N-terminal *rOaAEP1<sub>b</sub>* processing site. Catalytically important residues are shown in red and labeled \*. Residues presumed to be important for substrate binding were identified based on the crystal structure of human legumain bound to cystatin (PDB ID: 4N6O) and are highlighted in purple. The *O. affinis* AEP1<sub>b</sub> sequence is as for AEP1 (c.5.2) but with a Glu to Val substitution at position 391, as indicated by ↓. When numbering is based on wt *OaAEP1<sub>b</sub>*, this corresponds to position 371 (see Fig. 2 A).



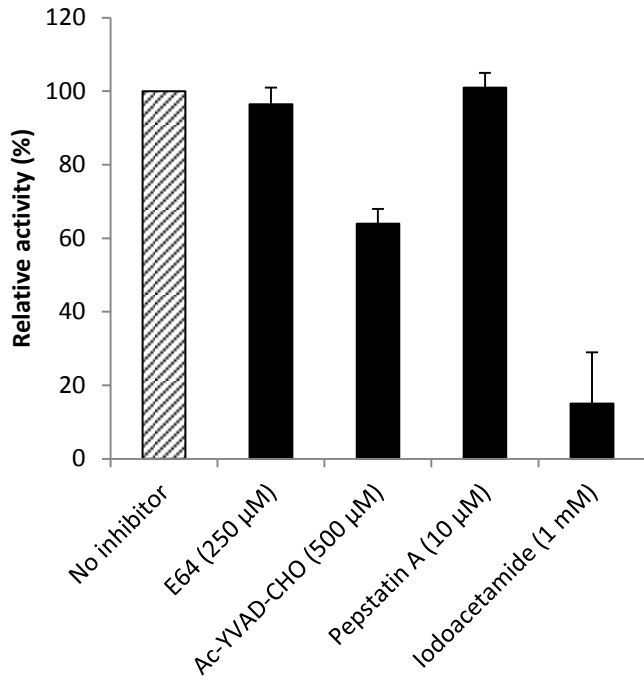

**Supplementary Figure 3:** *rOaAEP1<sub>b</sub>* activity against the wt IQF peptide in the presence of protease inhibitors. *rOaAEP1<sub>b</sub>* ( $\sim 4.4 \mu\text{g ml}^{-1}$  total protein) was allowed to cleave the wt IQF peptide (11  $\mu\text{M}$ ) and fluorescence intensity was recorded every minute for 90 min. The enzyme activity in the presence of inhibitors is reported relative to a no inhibitor control at the 90 min time point. Each data point represents the average of two technical replicates and error bars report the range.

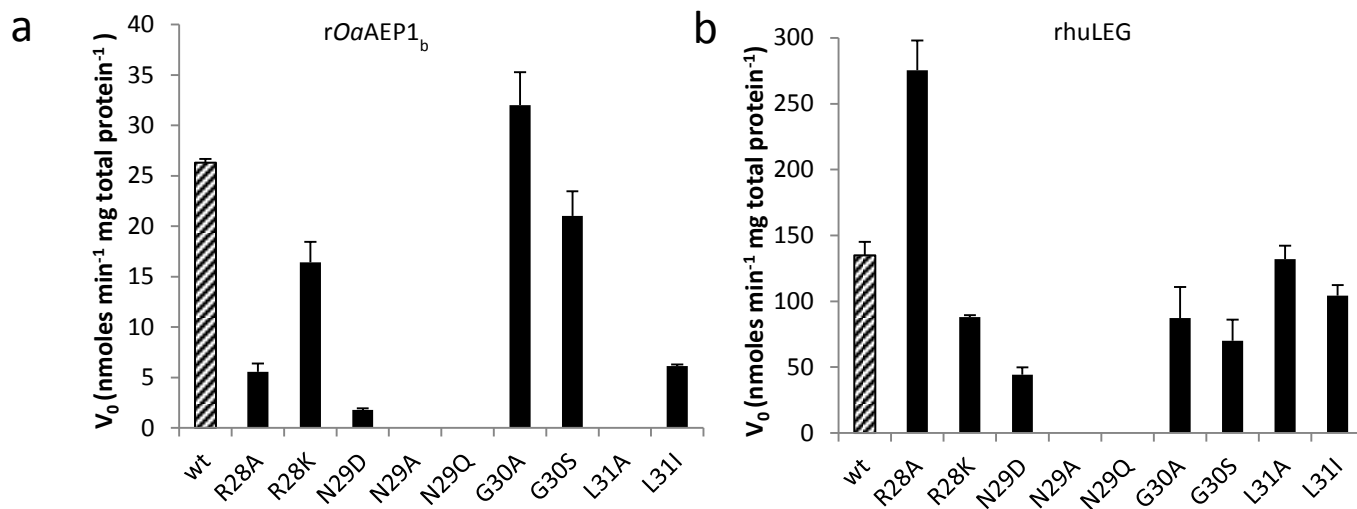

**Supplementary Figure 4:** Comparison of substrate specificity of plant and human AEPs. Initial velocity of (a) *rOaAEP1<sub>b</sub>* ( $\sim 3.5 \mu\text{g mL}^{-1}$  total protein) and (b) *rhuLEG* ( $1.1 \mu\text{g mL}^{-1}$  total protein) against  $50 \mu\text{M}$  FRET peptide substrates. The average of two technical replicates are shown and the error bars report the range.

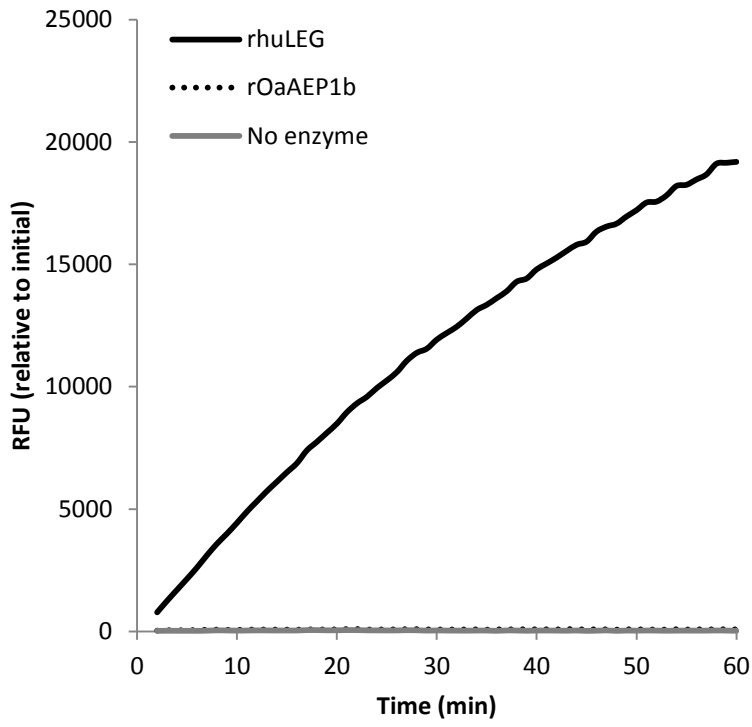

**Supplementary Figure 5:** *rOaAEP1<sub>b</sub>* does not cleave a substrate lacking *P'* residues. Activity of *rOaAEP1<sub>b</sub>* ( $\sim 5 \mu\text{g mL}^{-1}$  total protein) and *rhuLEG* ( $1.1 \mu\text{g mL}^{-1}$  total protein) against the fluorogenic substrate Z-AAN-MCA ( $100 \mu\text{M}$ ). A single representative experiment of two technical replicates is shown. RFU, relative fluorescence units.

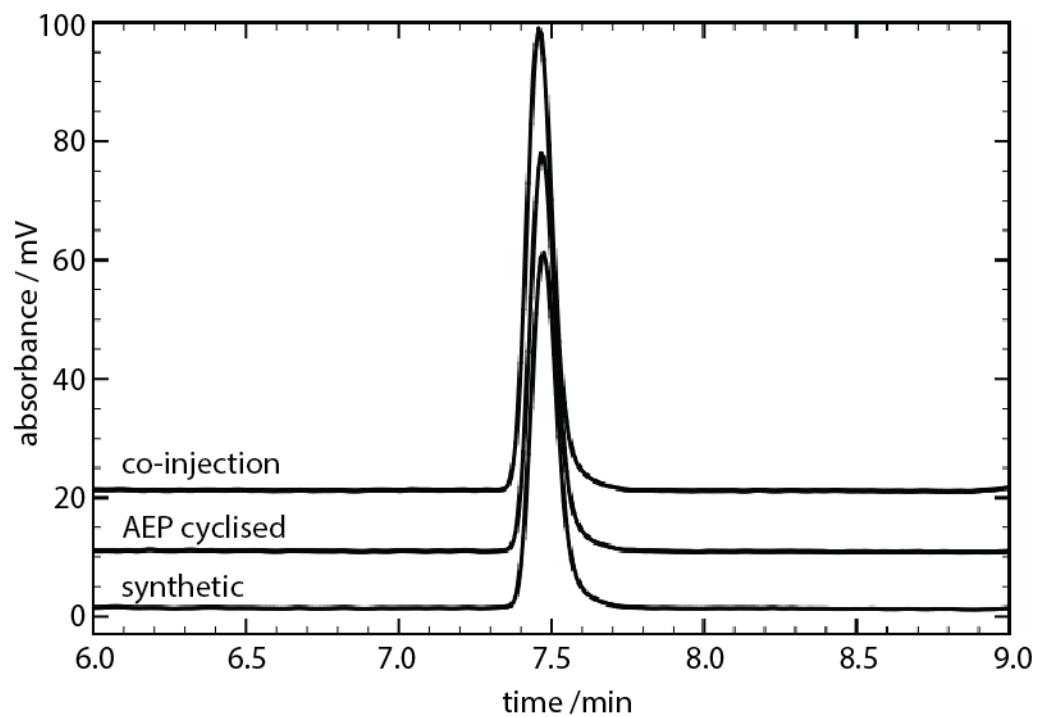

**Supplementary Figure 6:** HPLC analysis of kB1 produced *in vitro* by recombinant *O. affinis* AEP ("AEP cyclised"), synthetic kB1 and co-injection of both.

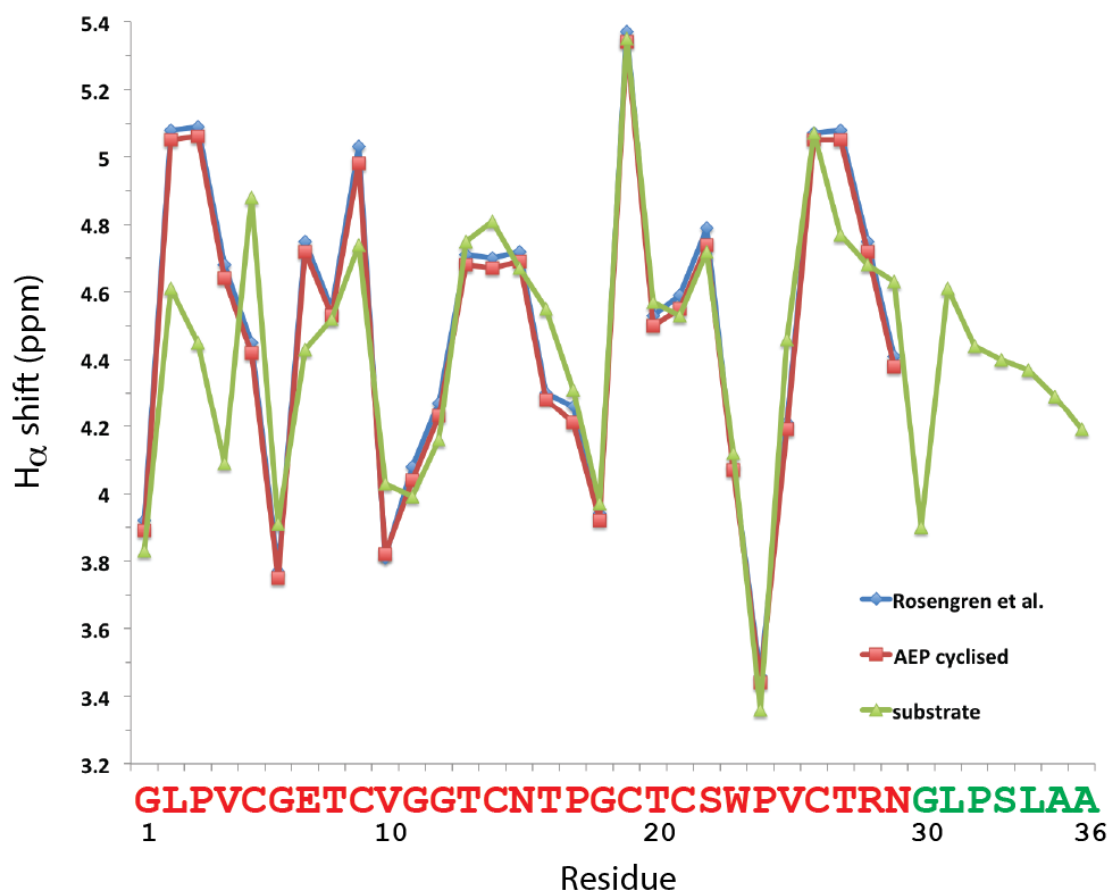

**Supplementary Figure 7 (a):**  $H_{\alpha}$ - chemical shift comparison of kB1 produced *in vitro* by recombinant *O. affinis* AEP ( ■ AEP cyclised), kB1 isolated from *O. affinis* ( ◆ Rosengren et al.)<sup>1</sup> and correctly folded linear kB1<sub>wt</sub> ( ▲ substrate). Minor shift differences of 0.03 ppm can be attributed to differences in pH and chemical shift referencing.

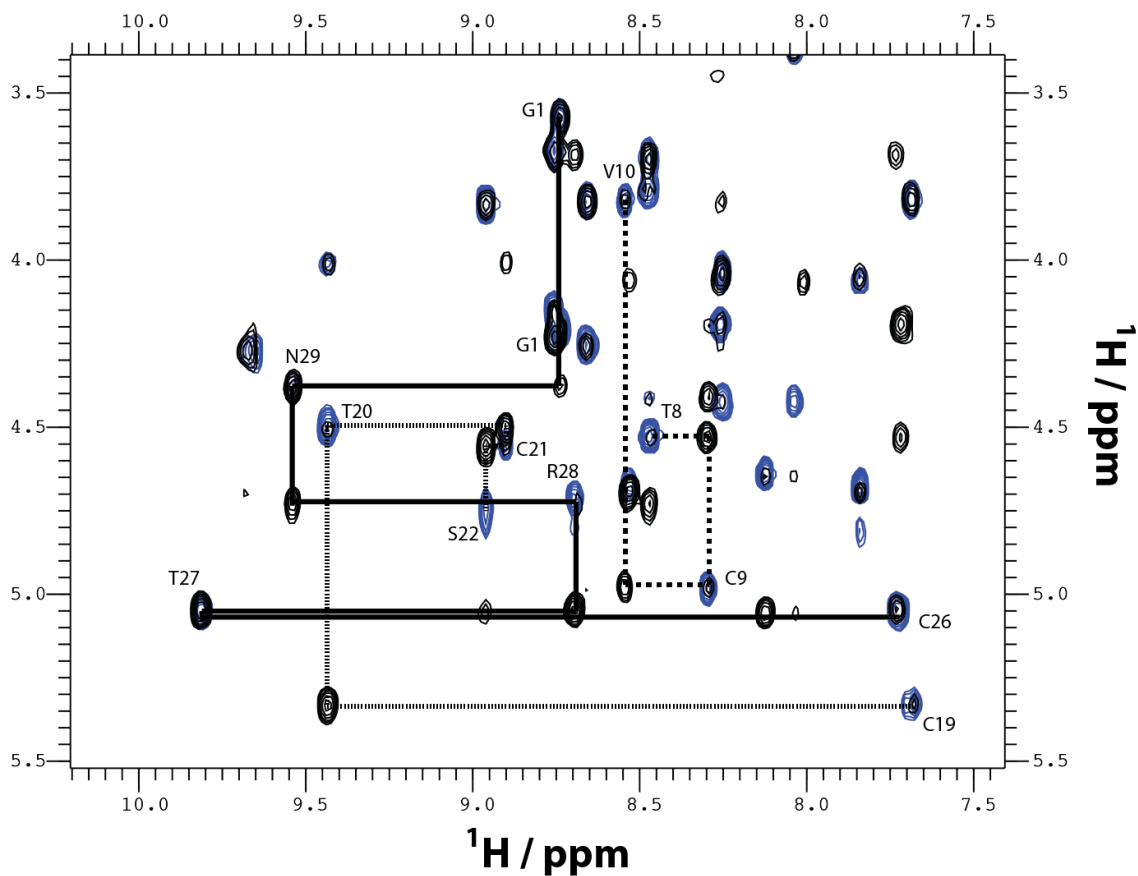

**Supplementary Figure 7 (b):** TOCSY (blue) and NOESY (black) spectra of the fingerprint region of kB1 produced *in vitro* by recombinant AEP. Representative NH- $H_{\alpha}$  correlations of some spin systems are labelled. The presence of a cyclic backbone is supported by the appearance of a (sequential) Asn29 $H_{\alpha}$  - Gly1 $NH$  correlation and an Asn29 $NH$  - Gly1 $NH$  correlation (not shown).



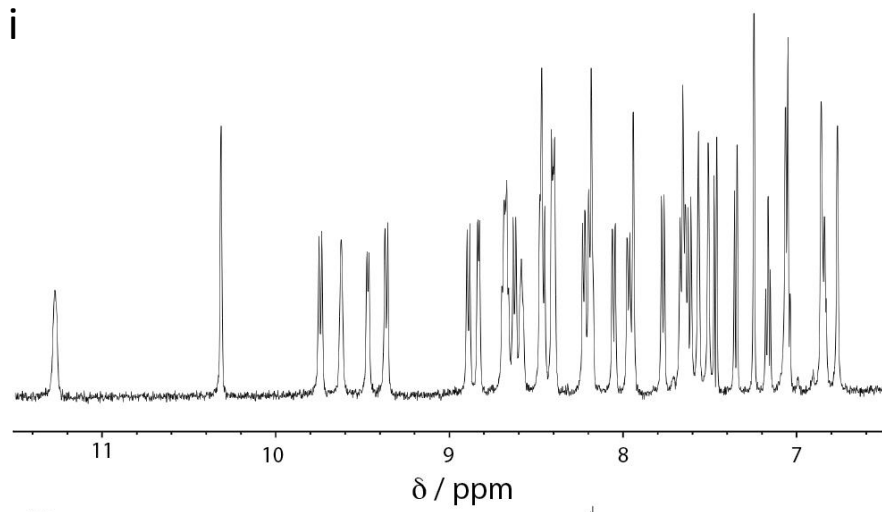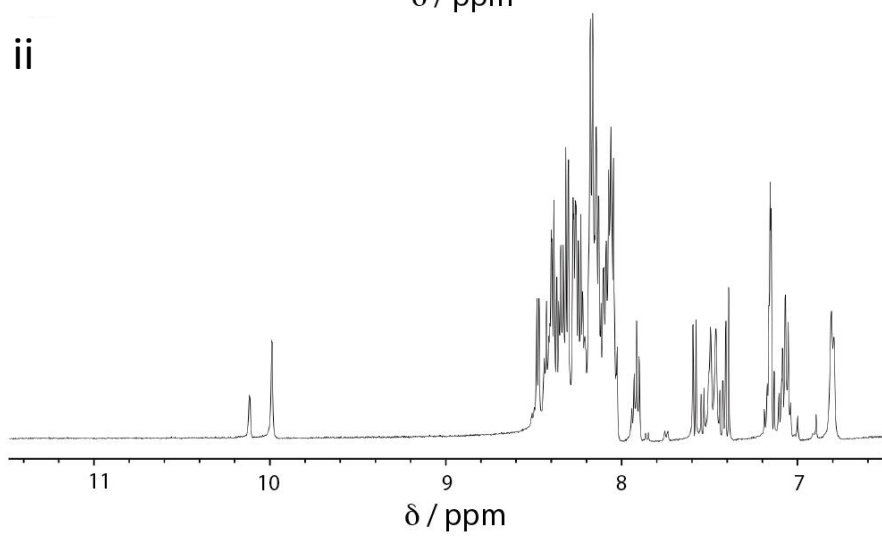

**Supplementary Figure 7 (c):**  $1\text{D-}^1\text{H}$  NMR spectra of the aromatic/amide fingerprint region of kB1 *in vitro* cyclised by recombinant AEP (i) and kB1(6xSer)-CTR (ii).

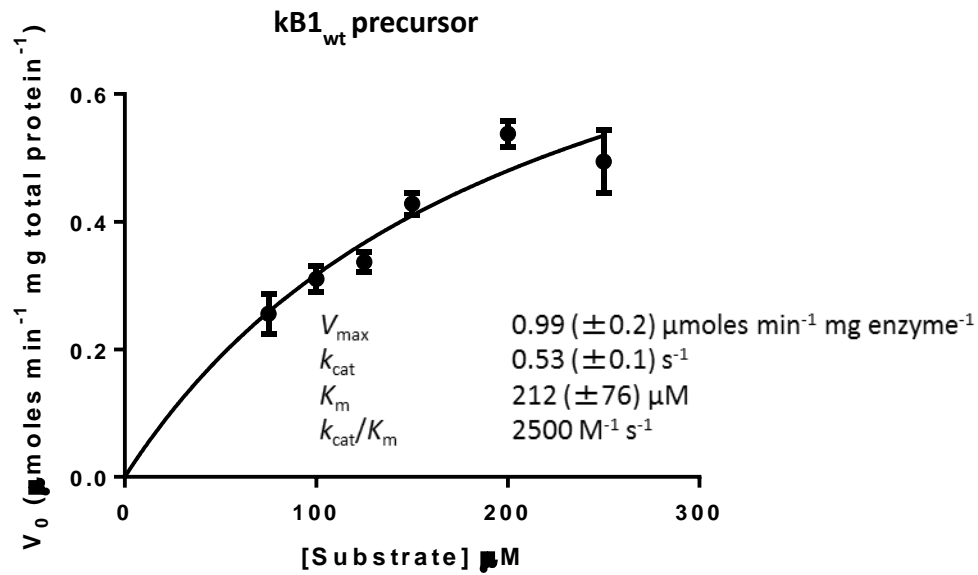

**Supplementary Figure 8:** Kinetics of *rOaAEP1<sub>b</sub>*-mediated cyclisation. Varying concentrations of substrate (kB1<sub>wt</sub> precursor) were incubated with enzyme (19.7 μg mL<sup>-1</sup> total protein) for 5 min. The amount of product formed was inferred by monitoring depletion of the precursor by RP-HPLC. A Michaelis-Menten plot shows the mean of three technical replicates and error bars report the SEM. The kinetic parameters derived from this plot are listed (±SEM).

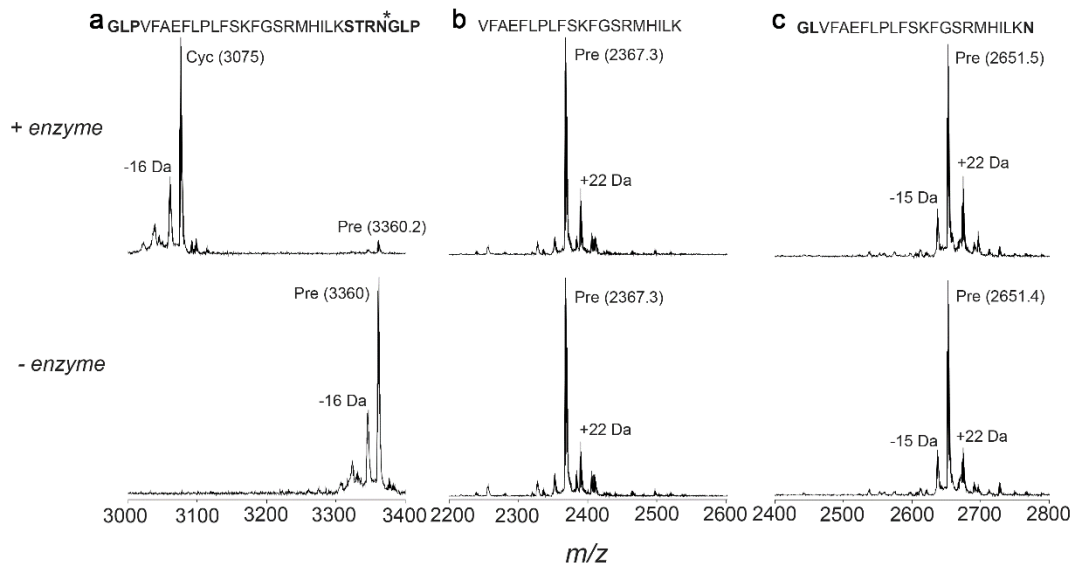

**Supplementary Figure 9:** *rOaAEP1<sub>b</sub>* does not cyclise a model peptide without appropriate flanking sequences. (a-c) MALDI MS spectra of the native R1 peptide with various flanking sequences 22 h post-addition of *rOaAEP1<sub>b</sub>* (24  $\mu\text{g mL}^{-1}$  total protein). Bold residues, flanking sequences. Asterisk, *rOaAEP1<sub>b</sub>* cleavage site. Observed monoisotopic masses (Da;  $[M+H]^+$ ) are listed. +22 Da and -15/-16 Da peaks present in some precursor and product spectra are likely to represent  $\text{Na}^+$  adducts and a synthesis-derived modification respectively. Cyc, cyclic product; Pre, linear precursor. A representative experiment of three technical replicates is shown.

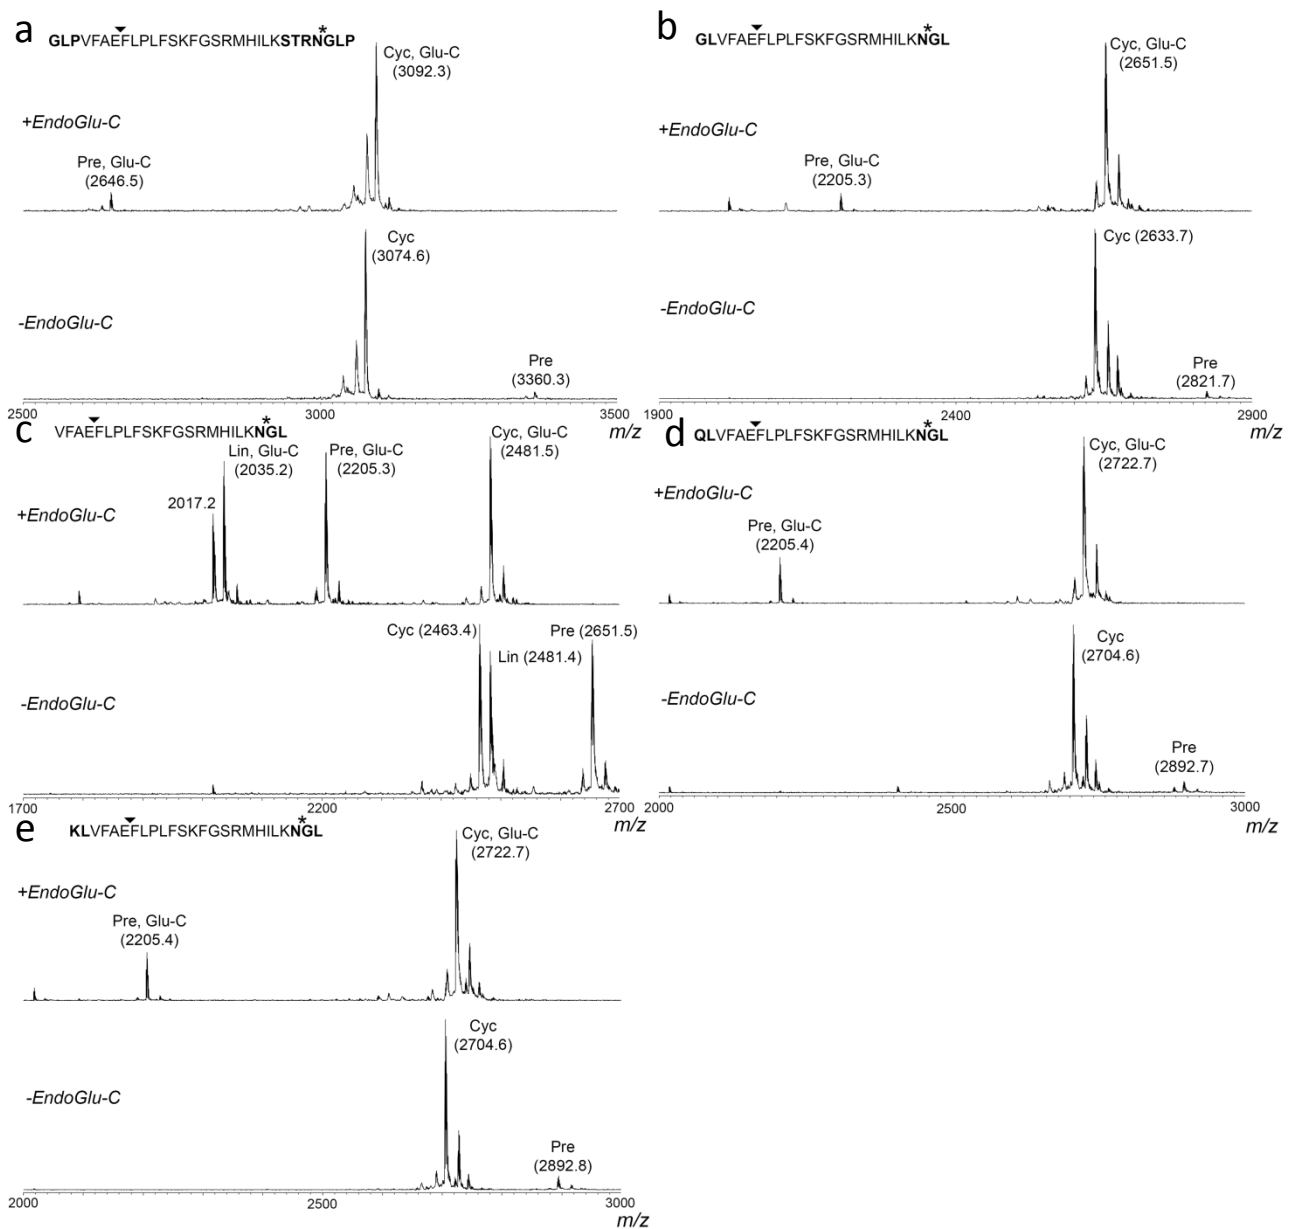

**Supplementary Figure 10: EndoGlu-C digestion confirms that model peptides processed by rOaAEP1<sub>b</sub> are predominantly cyclic.** The R1 peptide (VFAEFLPLFSKFGSRMHILK) with various flanking sequences was incubated with rOaAEP1<sub>b</sub> (24 µg mL<sup>-1</sup> total protein) for 22 h. Processed peptides were then incubated a further 18 h at 37°C with or without the addition of EndoGlu-C and analysed by MALDI MS (a-e). Bold residues, flanking sequences. \*, rOaAEP1<sub>b</sub> cleavage site. ▼, EndoGlu-C cleavage site. Observed monoisotopic masses (Da; [M+H]<sup>+</sup>) are listed for dominant peaks. Cyc, cyclic product; Pre, linear precursor; Lin, linear product; Cyc Glu-C, cyclic product hydrolysed by endoGlu-C; Pre Glu-C, linear precursor hydrolysed by endoGlu-C; Lin endoGlu-C, linear product hydrolysed by endoGlu-C. A representative experiment of two technical replicates is shown.
